# Supplementary material for: Genetic Diversity of Venturia inaequalis in Latvia Revealed by Microsatellite Markers
Source: MDPI journal article supplement (doi:10.3390/pathogens11101165), 2022-10-09
Supplement: s1 [file s1]

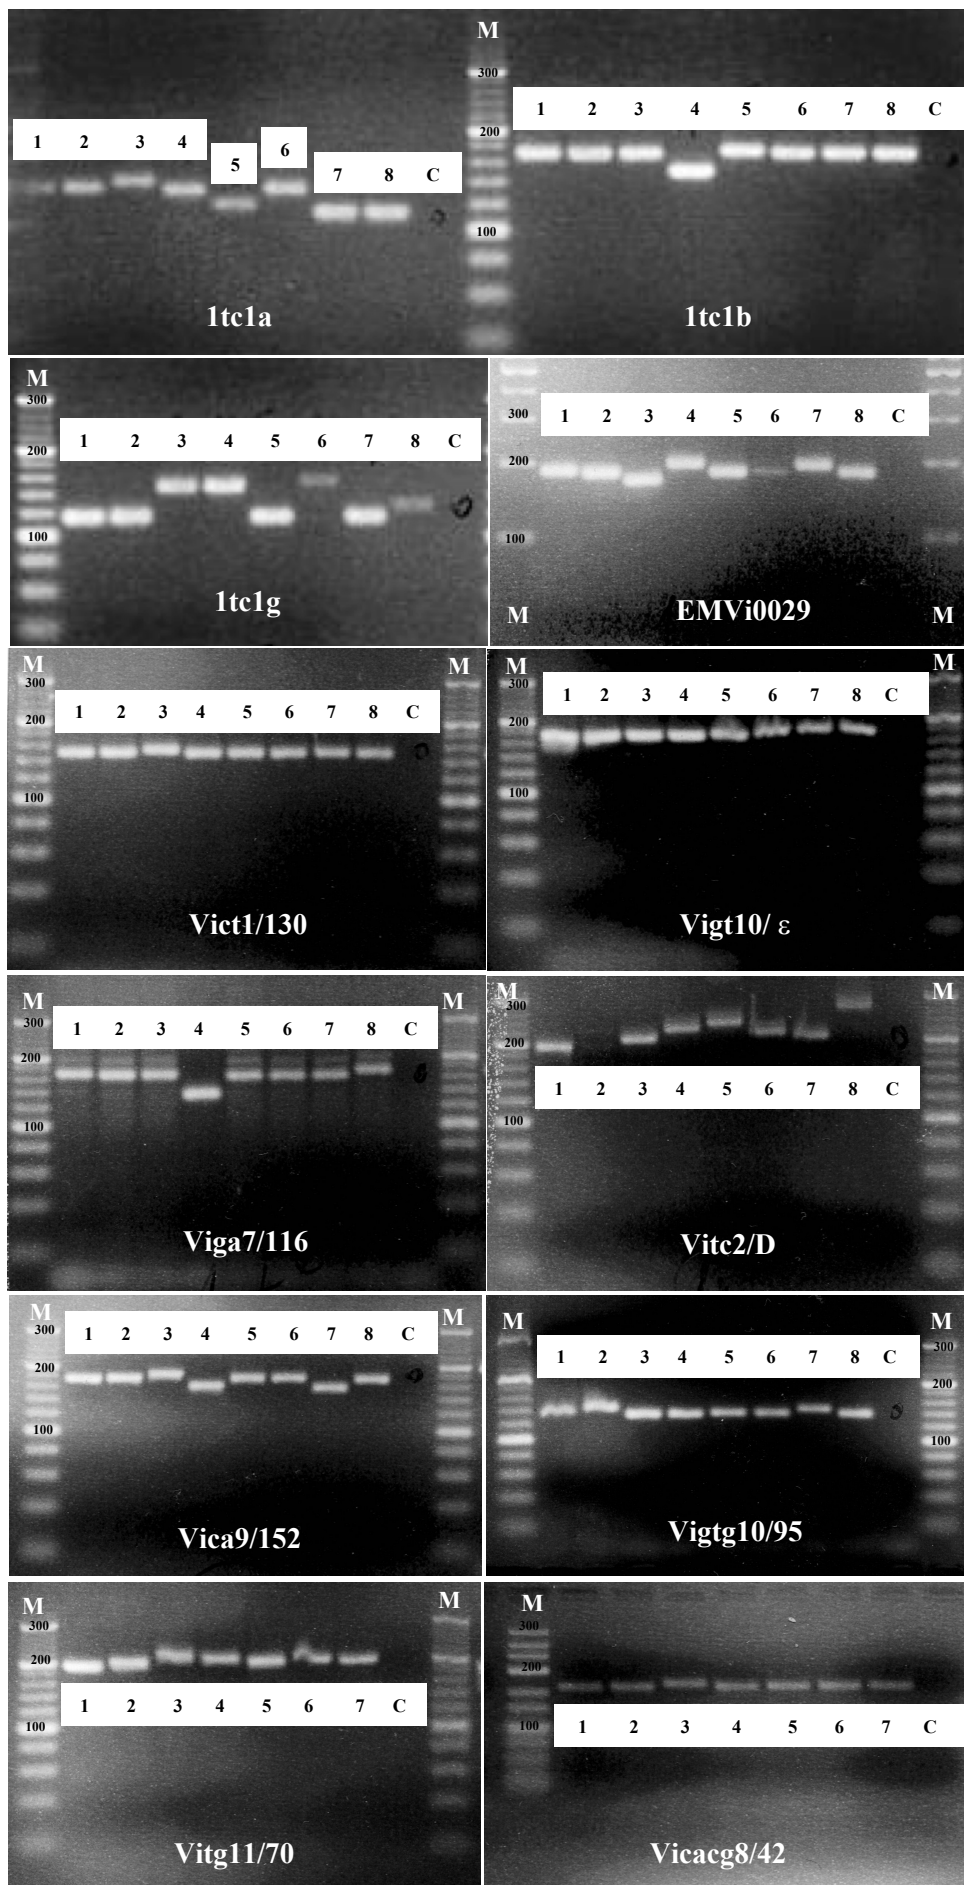

Figure S1. Agarose gel electrophoretic profiles of twelve SSR markers. Lanes 1-8: *V. inaequalis* strains of various origin; Lane C: Water control; Lane M: DNA ladder.
